# Supplementary material for: Enhanced Emission of Monoterpene 3-Carene in Pinus densiflora Infected by Pine Wood Nematode and Characterization of 3-Carene Synthase
Source: MDPI journal article supplement (doi:10.3390/f12050514), 2021-04-21
Supplement: s1 [file s1]

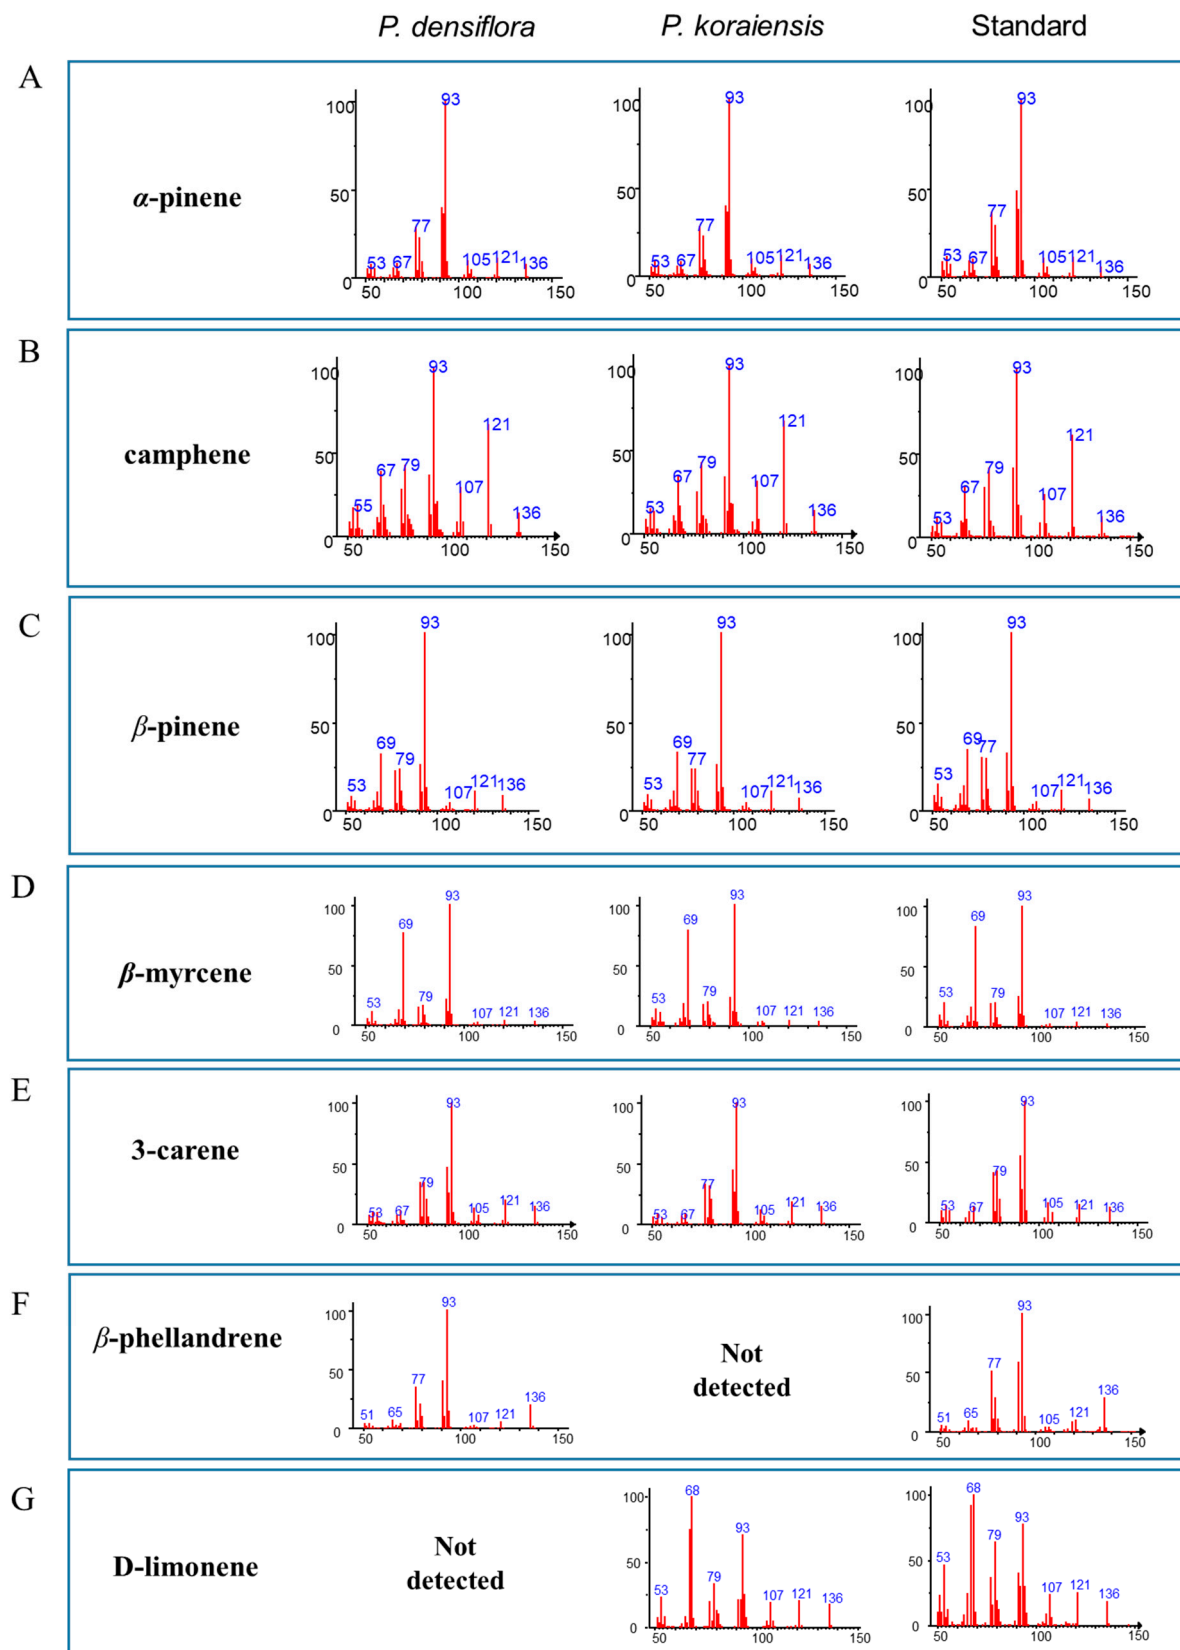

Figure S1. Mass fragments of monoterpene peaks detected in volatile organic compounds from *Pinus densiflora*, *P. koraiensis* and those of authentic standards: (a)  $\alpha$ -pinene; (b) camphene; (c)  $\beta$ -pinene; (d)  $\beta$ -myrcene; (e) 3-carene; (f)  $\beta$ -phellandrene; (g) D-limonene.

Sequence 1: P.densiflora 3-carene 626 aa  
Sequence 2: P.banksiana 3-carene1 626 aa  
Sequence 3: P.banksiana 3-carene2 626 aa  
Sequence 4: P.contorta 3-carene1 626 aa  
Sequence 5: Picea abies 3-carene 627 aa  
Sequence 6: Picea sitchensis 3-carene 627 aa

Pinus banksiana 3-carene2 MSLISAVPLASS-CYSKSLISSVREHTALPRAIATLQMSRPGKSVAAASIRMSSATAGSD  
Pinus contorta 3-carene1 MSLISAVPLASS-CYSKSLISSVREHTALPRAIATLQMSRPGKSVAAASIRMSSATAGSD  
Pinus densiflora 3-carene MSLISAVPLASS-CYSKSLISSVREHTALPRAIATLQMSRPGKSVAAASIRMSSATAGSD  
Pinus banksiana 3-carene1 MSLISAVPLASS-CYSKSLISSVREHTALPRAIATLQMSRPGKSVAAASIRMSSATAGSD  
Picea abies 3-carene MSVLSILPLASKSCLYKSLMSSSTHELKALCRPIATLGMCRPGKSVMAKSTSLTAVSD  
Picea sitchensis 3-carene MSVLSIYPLASKPCLYKSFISFTHPKALCRPISTVGLCRRAKSVTASMSSTALSD  
\*\*\* \*\*

Pinus banksiana 3-carene2 GVKRRI GDVHNSLWDDNF IQSLSSPVGASSVGEHADRLI GEVKEIFNFSFIADGELI SPV  
Pinus contorta 3-carene1 GVKRRI GDVHNSLWDDNF IQSLSSPVGASSVGEHADRLI GEVKEIFNFSFIADGELI SPV  
Pinus densiflora 3-carene GVKRRI GDVHNSLWDDNF IQSLSSPVGASSVGEHADRLI GEVKEIFNFSFIADGELI SPV  
Pinus banksiana 3-carene1 GVKRRI GDVHNSLWDDNF IQSLSSPVGASSVGEHADRLI GEVKEIFNFSFIADGELI SPV  
Picea abies 3-carene GVQPRI GDHNSLWDDNF IQSLSSPVGASSVGERAERLI GEVKEIFNLSRITDGLVSHV  
Picea sitchensis 3-carene GVQPRI GNHNSLWDDNF IQSLSSPVGASSVGERAERLI GEVKEIFNRI SMANGELYSHV  
\*\*\*\*\*

Pinus banksiana 3-carene2 NDLLDQLWMYDNERLGI DRHFQTEIKYALDYYVRYWSEEGI GCGRDSAFDTLNTTALAF  
Pinus contorta 3-carene1 NDLLDQLWMYDNERLGI DRHFQTEIKYALDYYVRYWSEEGI GCGRDSAFDTLNTTALAF  
Pinus densiflora 3-carene NDLLDQLWMYDNERLGI DRHFQTEIKYALDYYVRYWSEEGI GCGRDSAFDTLNTTALAF  
Pinus banksiana 3-carene1 NDLLDQLWMYDNERLGI DRHFQTEIKYALDYYVRYWSEEGI GCGRDSAFDTLNTTALAF  
Picea abies 3-carene DDLLDQLSMYDNERLGI DRHFQTEIKYSLDYYVRYWSEEGI GSGRDI VCTDLNTTALGF  
Picea sitchensis 3-carene DDLLDQLSMYDNERLGI DRHFQTEIKYSLDYYVRYWSEEGI GSGRDI VCDLNTTALGF  
\*\*\*\*\*

Pinus banksiana 3-carene2 RIFRLHGYTVSSDVFEHFKDQKGFQFAASANDTELQTRSVFNLFRASLI AFPEEKVLEEAE  
Pinus contorta 3-carene1 RIFRLHGYTVSSDVFEHFKDQKGFQFAASANDTELQTRSVFNLFRASLI AFPEEKVLEEAE  
Pinus densiflora 3-carene RIFRLHGYTVSSDVFEHFKDQKGFQFAASANDTELQTRSVFNLFRASLI AFPEEKVLEEAE  
Pinus banksiana 3-carene1 RIFRLHGYTVSSDVFEHFKDQKGFQFAASANDTELQTRSVFNLFRASLI AFPEEKVLEEAE  
Picea abies 3-carene RILRLHGYTVFPDVFEHFKDQMGRI ACSDNHTERQISSILNLFRASLI AFPEEKVLEEAE  
Picea sitchensis 3-carene RLLRLHGYTVFPDVFEHFKDQMGRI ACSTNQTERQISSILNLFRASLI AFPEEKVLEEAE  
\*\*\*\*\*

Pinus banksiana 3-carene2 KFAAAVLKAAALQTLPVSGLSREIQVYFDVYRWHSNLPLEARSYIDILADNTISGTPDANT  
Pinus contorta 3-carene1 KFAAAVLKAAALQTLPVSGLSREIQVYFDVYRWHSNLPLEARSYIDILADNTISGTPDANT  
Pinus densiflora 3-carene EFAAAVLKAAALQTLPVSGLSREIQVYFDVYRWHSNLPLEARSYIDILADNTISGTPDANT  
Pinus banksiana 3-carene1 KFAAAVLKAAALQTLPVSGLSREIQVYFDVYRWHSNLPLEARSYIDILADNTISGTPDANT  
Picea abies 3-carene IFSAITVLKEALQTI PVSSLSQEI QVYFDVYRWHSNLPLEARSYIDILQENTKNQMLDVNT  
Picea sitchensis 3-carene IFSTAVLKEALQTI PVSSLSREIQVYFDVYRWHSNLPLEARTYIDILRENATNETLDMKT  
\*\*\*\*\*

Pinus banksiana 3-carene2 KKLLELAKLEFNIFHSVQKELQCLWRWWWKEWGCELTFI RHRVVEFYTLVSGIDMVPEH  
Pinus contorta 3-carene1 KKLLELAKLEFNIFHSVQKELQCLWRWWWKEWGCELTFI RHRVVEFYTLVSGIDMVPEH  
Pinus densiflora 3-carene KKLLELAKLEFNIFHSLQKELQCLWRWWWKEWGCELTFI RHRVVEFYTLVSGIDMVPEH  
Pinus banksiana 3-carene1 KKLLELAKLEFNIFHSLQKELQCLWRWWWKEWGCELTFI RHRVVEFYTLVSGIDMVPEH  
Picea abies 3-carene KKVLELAKLEFNIFHSLQKELQCLWRWWWKEWGCELTFI RHRVVEFYTLVSGIDMEPKH  
Picea sitchensis 3-carene EKLLELAKLEFNIFHSLQKELQCLWRWWWKEWGCELTFI RHRVVEFYTLVSGIDMEPKR  
\*\*\*\*\*

Pinus banksiana 3-carene2 ATRFLSCVKTCHLITILDDMYDTFGTIDELRLFTAAYKRWDPSSATECLPEYMKGVVMVLY  
Pinus contorta 3-carene1 ATRFLSCVKTCHLITILDDMYDTFGTIDELRLFTAAYKRWDPSSATECLPEYMKGVVMVLY  
Pinus densiflora 3-carene ATRFLSCVKTCHLITILDDMYDTFGTIDELRLFTAAYKRWDPSSATECLPEYMKGVVMVLY  
Pinus banksiana 3-carene1 ATRFLSFVKMCHLITILDDMYDTFGTIDELRLFTAAYKRWDPSSATECLPEYMKGVVMVLY  
Picea abies 3-carene CTRFLSFVKMCHLITIVLDDMYDTFGTIDELRLFTAAYKRWDPSTTECLPEYMKGVVTVLY  
Picea sitchensis 3-carene STFRINFKVICHFTVILDDMYDTFGTIDELRLFTAAYKRWDPSSATECLPEYMKGVVTVLY  
\*\*\*\*\*

Pinus banksiana 3-carene2 ETYNEMAKEAQKSGRRDTLGYYRQALEDYIGSYLKEAEWATGVVPTFQEVFENGKLSG  
Pinus contorta 3-carene1 ETYNEMAKEAQKSGRRDTLGYYRQALEDYIGSYLKEAEWATGVVPTFQEVFENGKLSG  
Pinus densiflora 3-carene ETYNEMAKEAQKSGRRDTLGYYRQALEDYIGSYLKEAEWATGVVPTFQEVFENGKLSG  
Pinus banksiana 3-carene1 ETYNEMAKEAQKSGRRDTLGYYRQALEDYIGSYLKEAEWATGVVPTFQEVFENGKLSG  
Picea abies 3-carene ETYNEMAKEAQKSGRRDTLGYYRQALEDYIGSYLKEAEWATGVVPTFQEVFENGKLSG  
Picea sitchensis 3-carene ETYNELAREAVKSGRRDTLNYRQALEDYIGSYLKEAEWATGVVPTFQEVFENGKLSG  
\*\*\*\*\*

Figure S2. Amino acid sequences of 3-carene synthase in *Pinus* and *Picea* species.

Table S1. HS-SPME/GC-MS analysis of comparative peak area of volatile organic compounds in control and pine wood nematode infected *Pinus densiflora* and *P. koraiensis*.

| Peak | Compound              | Retention time (min) | Peak area $\times 10^{-6}$ |                           |                       |                            |
|------|-----------------------|----------------------|----------------------------|---------------------------|-----------------------|----------------------------|
|      |                       |                      | <i>P. densiflora</i>       |                           | <i>P. koraiensis</i>  |                            |
|      |                       |                      | Control (%)                | Infected tree (%)         | Control (%)           | Infected tree (%)          |
| 1    | oxime-methoxy-phenyl  | 3.75                 | 1.29 $\pm$ 0.04 (100)      | 0.29 $\pm$ 0.09 (22.48)   | 1.22 $\pm$ 0.05 (100) | 0.97 $\pm$ 0.15 (79.51)    |
| 2    | tricyclene            | 4.46                 | 0.46 $\pm$ 0.11 (100)      | 0.19 $\pm$ 0.02 (41.30)   | 0.04 $\pm$ 0.01 (100) | 0.18 $\pm$ 0.04 (450.00)   |
| 3    | $\alpha$ -pinene      | 4.72                 | 13.32 $\pm$ 1.66 (100)     | 26.68 $\pm$ 2.39 (200.30) | 1.00 $\pm$ 0.13 (100) | 17.02 $\pm$ 5.45 (1702.00) |
| 4    | camphene              | 5.09                 | 1.68 $\pm$ 0.77 (100)      | 1.33 $\pm$ 0.04 (79.17)   | 0.28 $\pm$ 0.11 (100) | 2.35 $\pm$ 0.30 (839.29)   |
| 5    | $\beta$ -pinene       | 5.80                 | 4.08 $\pm$ 0.69 (100)      | 11.95 $\pm$ 2.59 (292.89) | 0.21 $\pm$ 0.00 (100) | 4.33 $\pm$ 1.73 (2061.90)  |
| 6    | $\beta$ -myrcene      | 6.12                 | 0.25 $\pm$ 0.12 (100)      | 0.64 $\pm$ 0.13 (256.00)  | 0.10 $\pm$ 0.04 (100) | 0.78 $\pm$ 0.09 (780.00)   |
| 7    | 3-carene              | 6.70                 | 0.09 $\pm$ 0.01 (100)      | 0.87 $\pm$ 0.30 (966.67)  | 0.38 $\pm$ 0.01 (100) | 20.77 $\pm$ 5.55 (5465.79) |
| 8    | <i>p</i> -cymol       | 7.10                 | 0.44 $\pm$ 0.00 (100)      | 0.70 $\pm$ 0.02 (159.26)  | 0.03 $\pm$ 0.01 (100) | 0.24 $\pm$ 0.05 (800.00)   |
| 9    | $\beta$ -phellandrene | 7.23                 | 2.18 $\pm$ 1.06 (100)      | 8.37 $\pm$ 2.34 (383.94)  | —                     | —                          |
| 10   | D-limonene            | 7.24                 | —                          | —                         | 0.11 $\pm$ 0.00 (100) | 3.80 $\pm$ 1.34 (3454.54)  |

— indicates not detected.
